# Supplementary material for: Sandwich-structured Fe3O4@C@MoSe2 architecture for efficient lithium-ion storage
Source: Royal Society of Chemistry journal article supplement (doi:10.1039/d4cc04631e), 2024-01-01
Supplement: d4cc04631e1.pdf [file d4cc04631e1.pdf]

Electronic Supplementary Information (ESI) for Chemical  
Communications This journal is (c) The Royal Society of Chemistry  
2024

**Sandwich–structured Fe<sub>3</sub>O<sub>4</sub>@C@MoSe<sub>2</sub> architecture for efficient  
lithium ion storage**

Linan Yang,<sup>a</sup> Chengjie Zhang,<sup>a</sup> Liuyang Cao,<sup>a</sup> Rong Xu,<sup>a</sup> Hongbo Li,<sup>b</sup> Zhanjun Yang,<sup>a,\*</sup>  
Juan Li<sup>a,\*</sup>

<sup>a</sup> School of Chemistry and Chemical Engineering, Yangzhou University, Yangzhou 225002, P.R.  
China

<sup>b</sup> School of Chemistry and Chemical Engineering, Yancheng Institute of Technology, Yancheng  
224051, P. R. China.

## Experimental

**Materials and Reagents.** All of the electrolytes and Whatman glass fiber (GF/D) were sourced from DodoChem Co., Ltd. Ferric chloride (FeCl<sub>3</sub>), ammonium hydroxide (NH<sub>3</sub>·H<sub>2</sub>O), resorcin, selenium powder, sodium hydroxide (NaOH), formaldehyde solution (37 wt%), metallic lithium foil, hydrochloric acid (HCl), Na<sub>2</sub>MoO<sub>4</sub>·2H<sub>2</sub>O, ethylenediamine (EDA) and ammonia (N<sub>2</sub>H<sub>4</sub>·H<sub>2</sub>O) were purchased from Shanghai Sinopharm Co., Ltd. No further processing was applied to any of the chemicals.

**Instruments.** Polycrystalline powder X-ray diffractometer (XRD, D8 Advance, Bruker AXS, Germany) was used to characterize the crystal structure of the materials. The morphology and size of the materials were acquired using scan electron microscopy (SEM, Zeiss-Supra 55, 15.0 kV). Transmission electron microscopy (TEM, JEM-2100, Japan, 20 kV) and high-resolution transmission electron microscopy (HRTEM, Tecnai G2 F30 S-TWIN, 300 kV) were employed to further obtain the refined structure and element distribution information of the materials. Raman spectroscopy (Renishaw InVia, 532 nm laser) and X-ray photoelectron spectroscopy (XPS, ThermoFisher Scientific ESCALAB250Xi, America, Al/Mg K $\alpha$ ) were applied

for obtain the chemical structure, elemental composition and valence states information of the materials. And the XPS tests have a limit energy resolution of 0.43 eV, and the energy analysis range is 0-5000 eV. The specific surface area and pore size distribution were collected with N<sub>2</sub> adsorption analyzer (ASAP 2020 HD88). Thermogravimetric analysis (TGA) tests were conducted on a TGA analyzer (Pyris 1, TGA) with a heating rate of 10 °C min<sup>-1</sup> in an air atmosphere.

**Preparation of yolk-shell Fe<sub>3</sub>O<sub>4</sub>@C nanocubes.**  $\alpha$ -Fe<sub>2</sub>O<sub>3</sub> nanocubes were firstly synthesized by the following process. NaOH aqueous solution (50 mL, 5.4 mol/L) and FeCl<sub>3</sub> aqueous solution (50 mL, 2.0 mol/L) were prepared, and then mix in an oil bath at 75°C. After mixing, the resulting Fe(OH)<sub>3</sub> gels are poured into two 100 mL high-pressure reactors and heated at 100°C for 48 h. When the reaction is over, water and ethanol were centrifuged alternately until the yellow solution disappears and the red products were obtained. Finally, the  $\alpha$ -Fe<sub>2</sub>O<sub>3</sub> nanocubes products were dried in a vacuum drying oven at 60°C for 12 h.

The 80 mg of  $\alpha$ -Fe<sub>2</sub>O<sub>3</sub> nanocubes, 13 mL of water and 6 mL of N<sub>2</sub>H<sub>4</sub>·H<sub>2</sub>O (25 wt%) were evenly dispersed in 140 mL of ethanol under ultrasonic, then poured into 250 mL flask and stirred at 30°C. Then 30 mg of resorcin and 64  $\mu$ L of formaldehyde solution were added, and stirred for 24 h. After the reaction, the precipitations were collected by centrifugation and dried in a vacuum drying oven at 60°C for 12 h. Then, the samples were annealed at 700°C for 3 h in Ar atmosphere. The products were etched with 40 mL of HCl (4 mol/L) for 30 min, rinsed several times in the same way as above, and finally moved to a vacuum drying oven at 60°C for 12 h.

**Preparation of sandwich-structured Fe<sub>3</sub>O<sub>4</sub>@C@MoSe<sub>2</sub> architecture.** 0.16 g of selenium powder was added to 10 mL of hydrazine hydrate and stirred at 25°C for 5 h to obtain solution A. 0.24 g of Na<sub>2</sub>MoO<sub>4</sub>·2H<sub>2</sub>O was added to 50 mL of deionized water to acquire solution B. Under stirring conditions, solution A was added to solution B and stirred for 0.5 h. Then 5 mL of EDA was added to the above mixed solution, and continued stirring for 0.5 h, then adding 30 mg of yolk-shell Fe<sub>3</sub>O<sub>4</sub>@C with ultrasonic processing for 1 h. Finally, the solution was transferred to a high-pressure reactor and reacted at 200°C for 24 h. After the reaction was cooled to room temperature, the

precipitation was centrifuged, washed, collected, and dried in vacuum at 60°C. Finally, the composite material sandwich-structured  $\text{Fe}_3\text{O}_4@\text{C}@\text{MoSe}_2$  architecture was obtained by calcination at 700°C under the protection of Ar for 2 h.

On the basis of the above preparation, step (3) was omitted, and yolk-shell  $\text{Fe}_3\text{O}_4@\text{C}$  was used as one of the contrast materials. Then the core-shell  $\text{Fe}_3\text{O}_4@\text{C}$  was etched to form a hollow C box. And in step (3), the core-shell  $\text{Fe}_3\text{O}_4@\text{C}$  was replaced by a hollow C box, and the  $\text{C}@\text{MoSe}_2$  material was prepared as another contrast material.

**Electrochemical measurements.** Using N-Methyl-2-pyrrolidone (NMP) as solvent, sandwich-structured  $\text{Fe}_3\text{O}_4@\text{C}@\text{MoSe}_2$ , acetylene black and polyvinylidene difluoride (PVDF) were mixed and ground evenly according to the mass ratio of 7:2:1, and then stirred for 24 h to prepare the slurry. The resultant slurry was evenly coated on the copper foil by a coater and kept at 80°C for 10 h. After coating, the circular electrode sheet was cut into an electrode with a diameter of 1.6 cm by cutting machine. Then the cut electrode was transferred to a vacuum drying oven and dried it at 120°C for 12 h to remove solvent. The average areal loading amount of the active material is around  $1.25 \text{ mg cm}^{-2}$ . Finally, the electrodes were weighed and the 2032-type Coin cells were assembled in a glove box filled with Ar, and then were left to rest for 8 h. Xinwei (CT-3008W) high-performance detection system was used to carry out galvanostatic discharge-charge test in voltages range from 0.01 to 3.00 V (vs.  $\text{Li/Li}^+$ ). The cyclic voltammetry (CV) characteristic curve and electrochemical impedance (EIS) of the battery were tested by Chenhua electrochemistry workstation. In CV test, voltage range was set as 0.01-3 V and scanning rate as  $0.2 \text{ mV s}^{-1}$ . The scanning frequency range of EIS test was 0.01-100 KHz, and the voltage amplitude was of 5 mV.

**Effect of the amount of molybdenum source on the structure morphology of sandwich-structured  $\text{Fe}_3\text{O}_4@\text{C}@\text{MoSe}_2$  architecture.**

In the process of synthesizing sandwich-structured  $\text{Fe}_3\text{O}_4@\text{C}@\text{MoSe}_2$  architecture, adding 1 mM molybdenum source can realize the uniform growth of  $\text{MoSe}_2$  on the surface of  $\text{Fe}_3\text{O}_4@\text{C}$  (Fig. S1b). As shown in the Fig. S1, when the molybdenum source added is 0.5 mM (a), the growth of  $\text{MoSe}_2$  nanosheets on some

$\text{Fe}_3\text{O}_4@\text{C}$  surfaces is small and uneven, while when the molybdenum source added is 1.5 mM (c), a large number of  $\text{MoSe}_2$  nanosheets self-aggregate.

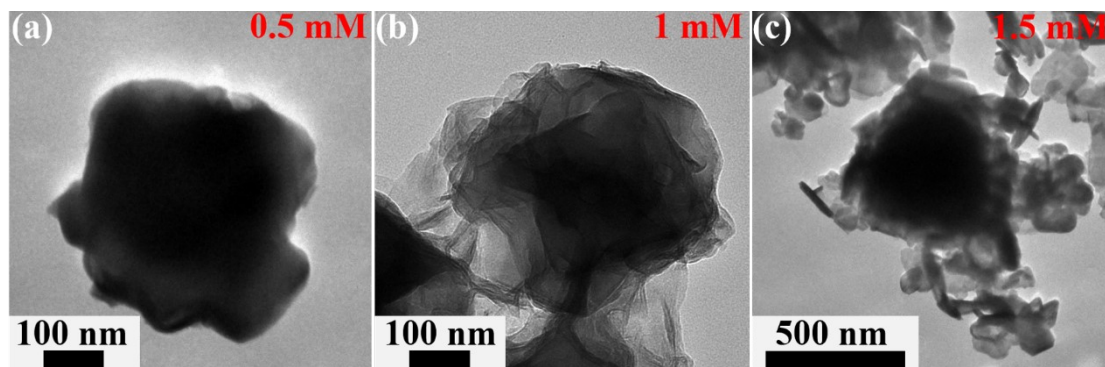

**Figure S1.** TEM images of the sandwich-structured  $\text{Fe}_3\text{O}_4@\text{C}@\text{MoSe}_2$  architecture are synthesized by adding (a) 0.5 mM, (b) 1 mM and (c) 1.5 mM molybdenum source.

### The morphology of the contrast material

In order to clarify the role of  $\text{Fe}_3\text{O}_4$  core, the comparative material  $\text{C}@\text{MoSe}_2$  was prepared, that is,  $\text{MoSe}_2$  was coated on the carbon box with all  $\text{Fe}_3\text{O}_4$  being fully removed. Fig. S2a shows the hollow carbon nanocubes obtained after complete etching. Its size is about 400 nm, and the wall thickness is about 20 nm. Using the same method,  $\text{MoSe}_2$  nanosheets could be coated onto hollow carbon box shell (Fig. S2b). However, different from the sandwich-structured  $\text{Fe}_3\text{O}_4@\text{C}@\text{MoSe}_2$ , the outer  $\text{MoSe}_2$  nanosheets of  $\text{C}@\text{MoSe}_2$  present a state of agglomeration, which is not beneficial to electrolyte infiltration and  $e^-/\text{ion}$  transmission.

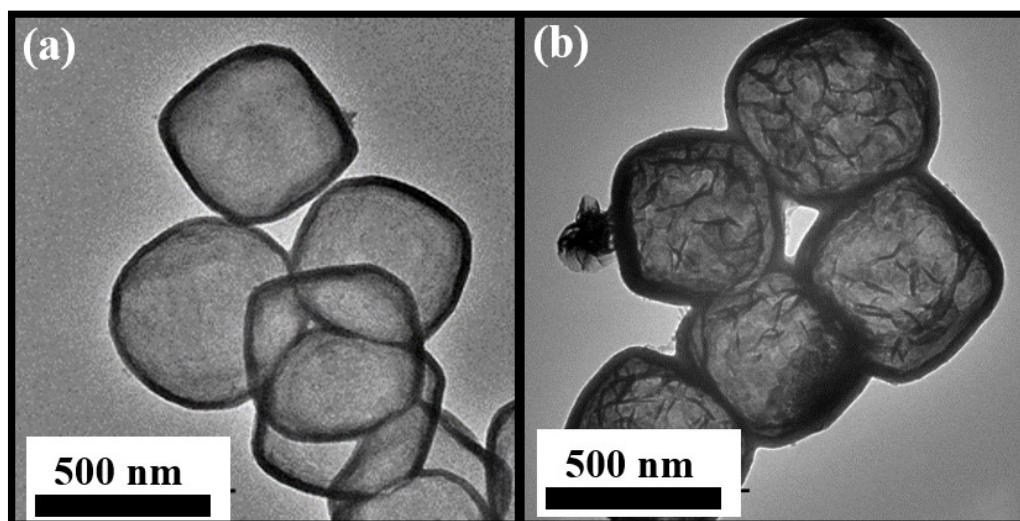

**Figure S2.** TEM images of (a) hollow C box and (b)  $\text{C}@\text{MoSe}_2$ .

### Thermogravimetric analysis of sandwich-structured Fe<sub>3</sub>O<sub>4</sub>@C@MoSe<sub>2</sub> and yolk-shell Fe<sub>3</sub>O<sub>4</sub>@C.

As shown in Fig. S3, the carbon content in the yolk-shell Fe<sub>3</sub>O<sub>4</sub>@C is about 2.36 wt%, as determined by TGA analysis (Oxidation of the very small amount of Fe<sub>3</sub>O<sub>4</sub> in the interior is ignored.). Moreover, the content of the outer coated MoSe<sub>2</sub> is calculated as 44.19 wt% through the TG of sandwich-structured Fe<sub>3</sub>O<sub>4</sub>@C@MoSe<sub>2</sub>. The following equation is the specific calculation process.

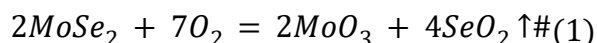

$$m(\text{MoSe}_2) = m(\text{SeO}_2) * M(\text{MoSe}_2) / M(\text{SeO}_2) / 2 = (40.99 - 2.36) * 253.87 / 110.96 / 2 \text{ wt}\% = 44.19 \text{ wt}\%$$

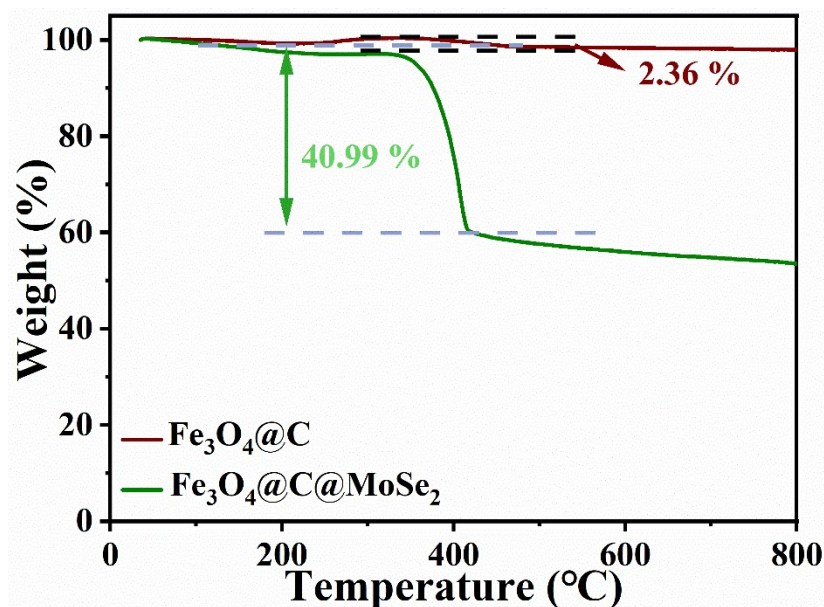

**Figure S3.** TGA of sandwich-structured Fe<sub>3</sub>O<sub>4</sub>@C@MoSe<sub>2</sub> and yolk-shell Fe<sub>3</sub>O<sub>4</sub>@C.

### N<sub>2</sub> isothermal adsorption/desorption measurements of sandwich-structured Fe<sub>3</sub>O<sub>4</sub>@C@MoSe<sub>2</sub> and yolk-shell Fe<sub>3</sub>O<sub>4</sub>@C.

Furthermore, according to N<sub>2</sub> isothermal adsorption/desorption measurements (Fig. S4a, ESI†), the specific surface area of Fe<sub>3</sub>O<sub>4</sub>@C@MoSe<sub>2</sub> (32.59 m<sup>2</sup> g<sup>-1</sup>) is higher than that of Fe<sub>3</sub>O<sub>4</sub>@C (12.93 m<sup>2</sup> g<sup>-1</sup>). And the pore size distribution curve (Fig. S4b, ESI†) shows that both of them have mesoporous structures. But the total pore volume of Fe<sub>3</sub>O<sub>4</sub>@C@MoSe<sub>2</sub> (1.23×10<sup>-1</sup> cm<sup>3</sup> g<sup>-1</sup>) is larger than that of Fe<sub>3</sub>O<sub>4</sub>@C (8.97×10<sup>-2</sup> cm<sup>3</sup>

g<sup>-1</sup>), and the former has a larger average pore size. The increased surface area and abundant mesoporous structure provide sufficient channels for Li<sup>+</sup>/e<sup>-</sup> migration, and alleviate the significant volume change during charge/discharge, improving electrode stability.

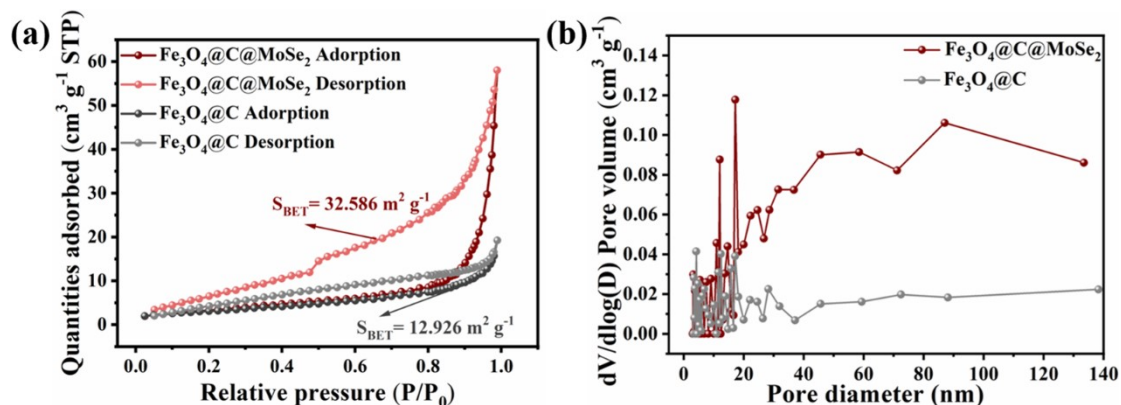

**Figure S4.** (a) N<sub>2</sub> adsorption-desorption isotherms and (b) pore size distribution curves of yolk-shell Fe<sub>3</sub>O<sub>4</sub>@C and sandwich-structured Fe<sub>3</sub>O<sub>4</sub>@C@MoSe<sub>2</sub>.

**C 1s X-ray photoelectron spectra of sandwich-structured Fe<sub>3</sub>O<sub>4</sub>@C@MoSe<sub>2</sub> architectures.**

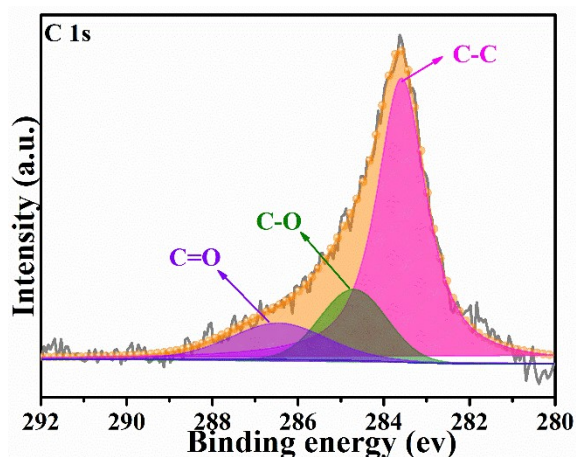

**Figure S5.** C 1s -XPS of sandwich-structured Fe<sub>3</sub>O<sub>4</sub>@C@MoSe<sub>2</sub> architectures.

**Discharge/charge curves of the yolk-shell Fe<sub>3</sub>O<sub>4</sub>@C, C@MoSe<sub>2</sub>, sandwich structured Fe<sub>3</sub>O<sub>4</sub>@C@MoSe<sub>2</sub> electrodes.**

Fig. 4d-f show the discharge/charge curves of three electrodes at the first three

cycles and tenth cycle at 0.1 A g<sup>-1</sup>, reflecting that test results are similar to CV curves. The Fe<sub>3</sub>O<sub>4</sub>@C@MoSe<sub>2</sub> electrode (Fig. 4f) shows potential plateaus at 1.8 and 0.9 V in the discharge curves, and exists a charge plateau at 2.2 V, which is consistent with CV curve. Moreover, the initial discharge/charge specific capacity of the Fe<sub>3</sub>O<sub>4</sub>@C@MoSe<sub>2</sub> electrode is 1397.5 and 1097.0 mAh g<sup>-1</sup>, respectively, which is higher than that of C@MoSe<sub>2</sub> electrode (Fig. 4e). The initial Coulombic efficiency (CE) of the Fe<sub>3</sub>O<sub>4</sub>@C@MoSe<sub>2</sub> electrode (78.5%) is slightly higher than that of the C@MoSe<sub>2</sub> (77.8%). The low initial CE is mainly due to the formation of irreversible SEI film. The initial discharge/charge capacity of yolk-shell Fe<sub>3</sub>O<sub>4</sub>@C electrode (1836/1215 mAh g<sup>-1</sup>) is higher than that of Fe<sub>3</sub>O<sub>4</sub>@C@MoSe<sub>2</sub> electrode, but the initial CE (66.1%) is much lower. For the conversion anode materials with poor conductivity and serious volume effect, improving the initial CE is more critical than providing capacity. Therefore, the Fe<sub>3</sub>O<sub>4</sub>@C@MoSe<sub>2</sub> as the anode of LIBs has higher initial CE, reversible specific capacity and cyclic stability, and shows excellent electrochemical performance.

### **Lithium storage mechanism discussion.**

Figure S6 shows the second cycle charge-discharge curve at 0.1 A g<sup>-1</sup> current density. The charge and discharge platform in the figure can show the performance mechanism of the battery charge and discharge cycle in this work, which can be expressed by the following formula:

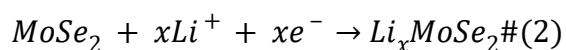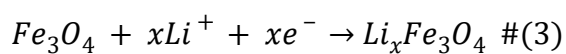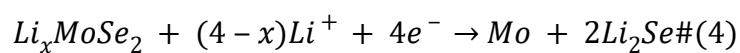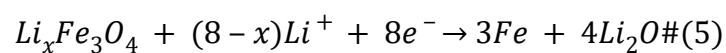

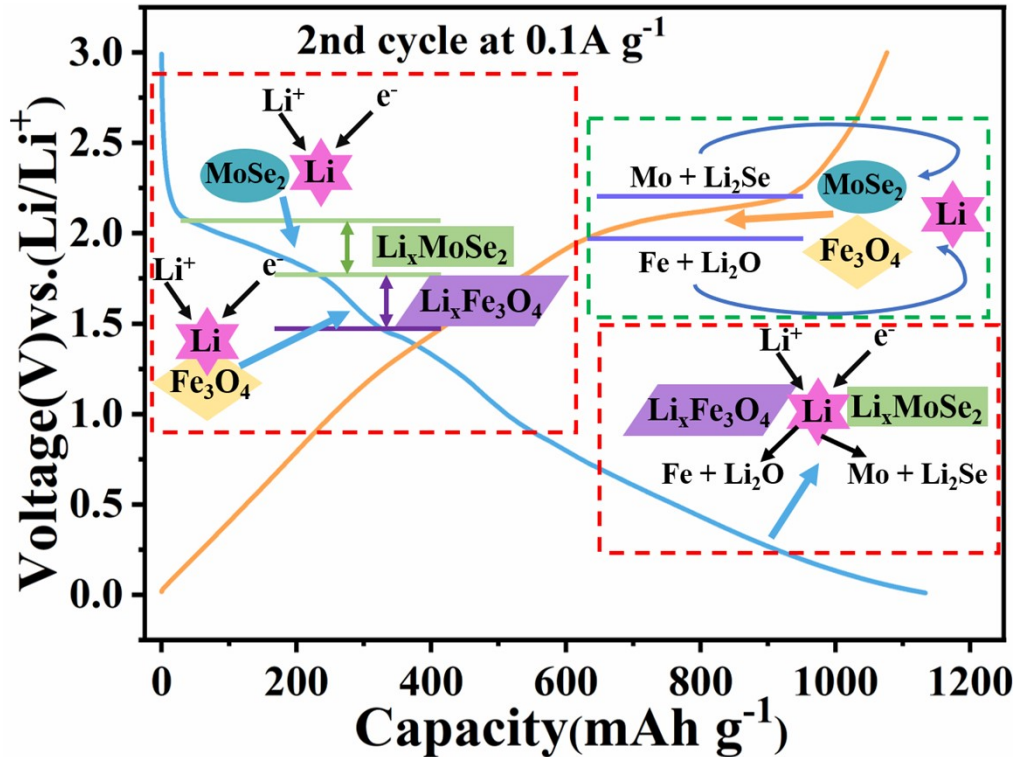

**Figure S6.** Charge-discharge profiles of  $\text{Fe}_3\text{O}_4@\text{C}@\text{MoSe}_2$  electrode at the 2nd cycle.

#### A detailed analysis of the Nyquist plots.

The Nyquist plots of three electrodes measured by EIS are composed of semicircles in the high/intermediate frequency region and inclined lines in the low frequency region (Fig. 5d). The smaller the semicircle diameter, the smaller resistance, the more conducive to  $e^-$  transmission. By comparison, the semicircle diameter of  $\text{Fe}_3\text{O}_4@\text{C}@\text{MoSe}_2$  composite is slightly smaller than yolk-shell  $\text{Fe}_3\text{O}_4@\text{C}$  and much smaller than  $\text{C}@\text{MoSe}_2$ . This indicates that the coating of  $\text{MoSe}_2$  nanosheets on the surface will lead to the increase of electrode resistance. But the unique structure of the yolk-shell  $\text{Fe}_3\text{O}_4@\text{C}$  can effectively avoid the agglomeration of  $\text{MoSe}_2$  nanosheets and enhance the electrical conductivity, which is conducive to the rapid transmission of  $e^-$  in the electrode to achieve faster charge transfer. The inclined line in the low frequency region corresponds to the diffusion speed of  $\text{Li}^+$ , and the larger the slope, the best  $\text{Li}^+$  diffusion kinetics. The slope of the inclined line of  $\text{Fe}_3\text{O}_4@\text{C}@\text{MoSe}_2$  electrode in the low frequency region is slightly larger than that of yolk-shell  $\text{Fe}_3\text{O}_4@\text{C}$  electrode, but



less than that of C@MoSe<sub>2</sub>. This means that the presence of MoSe<sub>2</sub> nanosheets can greatly shorten the diffusion path of Li<sup>+</sup> and improve the diffusion ability. However, due to the presence of Fe<sub>3</sub>O<sub>4</sub> core part, the ion diffusion speed of architecture is hindered. Therefore, the Fe<sub>3</sub>O<sub>4</sub>@C@MoSe<sub>2</sub> is an excellent electrode material which combines the advantages of Fe<sub>3</sub>O<sub>4</sub>, MoSe<sub>2</sub> and C.

#### **Morphology of sandwich-structured Fe<sub>3</sub>O<sub>4</sub>@C@MoSe<sub>2</sub> electrode after 50 cycles.**

As shown in Fig. S7, the sandwich-structured Fe<sub>3</sub>O<sub>4</sub>@C@MoSe<sub>2</sub> architecture can still basically maintain the sandwich-structure after 50 cycles at the current density of 0.1 A g<sup>-1</sup>, and no obvious structural collapse occurs.

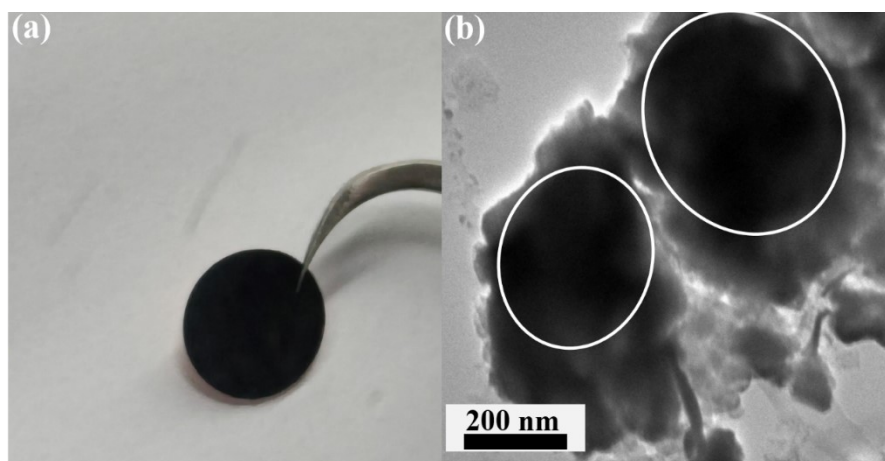

**Figure S7.** (a) Digital photograph and (b) TEM image of the Fe<sub>3</sub>O<sub>4</sub>@C@MoSe<sub>2</sub> electrode after 50 cycles at a current density of 0.1 A g<sup>-1</sup>.

**Table S1** Comparison of lithium storage performance of some MoSe<sub>2</sub>-based anode materials.

| Sample                                              | Current density<br>(A g <sup>-1</sup> ) | Number of<br>cycles | Capacity<br>(mAh g <sup>-1</sup> ) | Reference    |
|-----------------------------------------------------|-----------------------------------------|---------------------|------------------------------------|--------------|
| MoSe <sub>2</sub> nanoflowers                       | 0.1                                     | 200                 | 641.4                              | 1            |
| MoO <sub>2</sub> @MoSe <sub>2</sub>                 | 2                                       | 400                 | 520.4                              | 2            |
| MoSe <sub>2</sub> /CMK-5                            | 0.1                                     | 100                 | 788                                | 3            |
| MoSe <sub>2</sub> /rGO                              | 0.5                                     | 100                 | 917                                | 4            |
| 2D MoSe <sub>2</sub> /rGO                           | 0.1                                     | 100                 | 715                                | 5            |
| MoSe <sub>2</sub> /NC                               | 0.2                                     | 150                 | 86                                 | 6            |
| MoO <sub>2</sub> @MoSe <sub>2</sub> @NC             | 0.5                                     | 80                  | 468                                | 7            |
| NHMCFs/MoSe <sub>2</sub>                            | 1                                       | 400                 | 586.7                              | 8            |
| MoSe <sub>2</sub> @Ti <sub>2</sub> N MXene          | 0.1                                     | 200                 | 826                                | 9            |
| MoSe <sub>2</sub> /C                                | 0.1                                     | 50                  | 576.7                              | 10           |
| sandwich-structured                                 | 0.1                                     | 70                  | 876                                | This article |
| Fe <sub>3</sub> O <sub>4</sub> @C@MoSe <sub>2</sub> | 1                                       | 300                 | 609                                |              |

## References

- S1 H.J. Zhang, Y.K. Wang, L.B. Kong, *Nanoscale*, 2019, **11**, 7263-7276.
- S2 X. Zhao, J.H. Sui, F. Li, H.T. Fang, H.G. Wang, J.Y. Li, W. Cai, G.Z. Cao, *Nanoscale*, 2016, **8**, 17902-17910.
- S3 C. Zheng, C.R. Chen, L. Chen, M.D. Wei, *J. Mater. Chem. A*, 2017, **5**, 19632-19638.
- S4 Z.A. Zhang, Y. Fu, X. Yang, Y.H. Qu, Z.Y. Zhang, *ChemNanoMat*, 2015, **1**, 409-414.
- S5 Z.G. Luo, J. Zhou, L.R. Wang, G.Z. Fang, A.Q. Pan, S.Q. Liang, *J. Mater. Chem. A*, 2016, **4**, 15302-15308.
- S6 C. Zheng, J.X. Wu, Y.F. Li, X.J. Liu, L.X. Zeng, M.D. Wei, *ACS Sustain. Chem.*

*Eng.* 2021, **40**, 5514-5523.

S7 Z.X. Qin, X.L. Liu, Z.Y. Huang, R. Sun, Z.Y. Li, H.S. Fan, S.J. Lu, *Acta Metall.*

*Sin. (Engl. Lett.)*, 2021, **34**, 425-434.

S8 X.P. Ni, Z. Cui, H.X. Luo, H.F. Chen, C.L. Liu, Q.L. Wu, A.Q. Ju, *Chem. Eng. J.*

2021, **404**, 126249.

S9 H. Zong, L. Hu, Z.G. Wang, K. Yu, S.J. Gong, Z.Q. Zhu, *CrystEngComm*, 2020,

**22**, 5995-6002.

S10 Y. Liu, M.Q. Zhu, D. Chen, *J. Mater. Chem. A*, 2015, **3**, 11857-11862.
